# Supplementary material
Source: ML conference proceedings conference paper supplement (https://openaccess.thecvf.com/content/CVPR2023/html/Li_Correlational_Image_Modeling_CVPR_2023_paper.html)
Supplement: Supplementary file 1 [file Li_Correlational_Image_Modeling_CVPR_2023_supplemental.pdf]

# Correlational Image Modeling for Self-Supervised Visual Pre-Training —Supplementary Material

## A. Appendix

In the supplementary material, we provide the detailed pre-training and fine-tuning recipes in Section A.1. Section A.2 provides more qualitative visualization for *exemplar-context* images and predicted correlation maps.

### A.1. Implementation Details

**Pre-training.** Table 1 summarizes the pre-training settings for vanilla ViT and ResNet-50 models. All experiments are conducted on 8 A100 GPUs for both ViT and ResNet-50 models. Our CIM is *general* across architectures that the configurations are *shared* by different architectures, without specialized tuning.

**Fine-tuning.** Table 2 and Table 3 summarize the fine-tuning settings for vanilla ViT and ResNet-50 models, respectively. The configurations for ViT are *shared* across models. The configurations for ResNet-50 basically follow [16], using the AdamW optimizer following [8].

**Semantic segmentation on ADE20K.** Following the configurations in BEiT [1], we fine-tune UperNet [17] using AdamW as the optimizer for 160K iterations with a batch size of 16. The input resolution is  $512 \times 512$ , and we use single-scale inference. Following the common practice of BERT [6] fine-tuning in NLP [12], we initialize all segmentation models using model weights after supervised fine-tuning on ImageNet-1K as suggested in BEiT [1].

Table 1. **Pre-training settings for vanilla ViT-S/16, ViT-B/16 and ResNet-50 models on ImageNet-200 and ImageNet-1K.** Note that we adopt the *same* pre-training configurations across different architectures without further parameter tuning.

| Configuration                                    | Value                              |
|--------------------------------------------------|------------------------------------|
| Optimizer                                        | AdamW [11]                         |
| Pre-training epochs                              | 300                                |
| Peak learning rate                               | 2.4e-3                             |
| Batch size                                       | 4096                               |
| Weight decay                                     | 0.05                               |
| Optimizer momentum                               | $\beta_1, \beta_2 = 0.9, 0.95$ [3] |
| Learning rate schedule                           | Cosine decay                       |
| Warmup epochs                                    | 40                                 |
| Gradient clipping                                | 1.0                                |
| Dropout [13]                                     | ✗                                  |
| Stochastic depth [10]                            | ✗                                  |
| LayerScale [15]                                  | ✗                                  |
| Data augmentation                                | RandomResizedCrop                  |
| Pos. emb. in Transformer layers                  | 1-D absolute pos. emb. [7]         |
| Patch size                                       | 16                                 |
| Pre-training resolution of <i>context</i> image  | 160                                |
| Pre-training resolution of <i>exemplar</i> image | 64                                 |
| Number of <i>exemplars</i>                       | 6                                  |

Table 2. **Fine-tuning settings for vanilla ViT-S/16 and ViT-B/16 on ImageNet-200 and ImageNet-1K.** We fine-tune ViT-S/16 for 200 epochs, and ViT-B/16 for 100 epochs. All other hyper-parameters are the same.

| Configuration                      | Value                           |
|------------------------------------|---------------------------------|
| Optimizer                          | AdamW [11]                      |
| Fine-tuning epochs                 | 200 (S), 100 (B)                |
| Peak learning rate                 | 9.6e-3                          |
| Layer-wise learning rate decay [1] | 0.8 [4]                         |
| Batch size                         | 2048                            |
| Weight decay                       | 0.05                            |
| Optimizer momentum                 | $\beta_1, \beta_2 = 0.9, 0.999$ |
| Learning rate schedule             | Cosine decay                    |
| Warmup epochs                      | 5                               |
| Loss function                      | Cross-entropy loss              |
| Gradient clipping                  | $\times$                        |
| Dropout [13]                       | $\times$                        |
| Stochastic depth [10]              | 0.1                             |
| Mixup [19]                         | 0.8                             |
| Cutmix [18]                        | 1.0                             |
| Label smoothing [14]               | 0.1                             |
| Random augmentation [5]            | 9 / 0.5                         |
| Patch size                         | 16                              |
| Fine-tuning resolution             | 224                             |
| Test resolution                    | 224                             |

Table 3. **Fine-tuning settings for vanilla ResNet-50 on ImageNet-1K.** The hyper-parameters generally follow [16], except that we adopt the AdamW optimizer following [8].

| Configuration                      | 100 epoch FT              | 300 epoch FT |
|------------------------------------|---------------------------|--------------|
| Optimizer                          | AdamW [11]                |              |
| Peak learning rate                 | 12e-3                     |              |
| Layer-wise learning rate decay [1] | $\times$                  |              |
| Batch size                         | 2048                      |              |
| Weight decay                       | 0.02                      |              |
| Learning rate schedule             | Cosine decay              |              |
| Warmup epochs                      | 5                         |              |
| Loss function                      | Binary cross-entropy loss |              |
| Gradient clipping                  | $\times$                  |              |
| Dropout [13]                       | $\times$                  |              |
| Stochastic depth [10]              | $\times$                  |              |
| Mixup [19]                         | 0.1                       |              |
| Cutmix [18]                        | 1.0                       |              |
| Label smoothing [14]               | 0.1                       | $\times$     |
| Repeated augmentation [2,9]        | $\times$                  | $\checkmark$ |
| Random augmentation [5]            | 6 / 0.5                   | 7 / 0.5      |
| Fine-tuning resolution             | 160                       | 224          |
| Test resolution                    | 224                       |              |
| Test crop ratio                    | 0.95                      |              |

## A.2. More Visualization

We provide more qualitative visualization of *exemplar-context* images together with both ground-truth and predicted correlation maps for CIM in Figure 1, using unseen ImageNet-1K *validation* images.

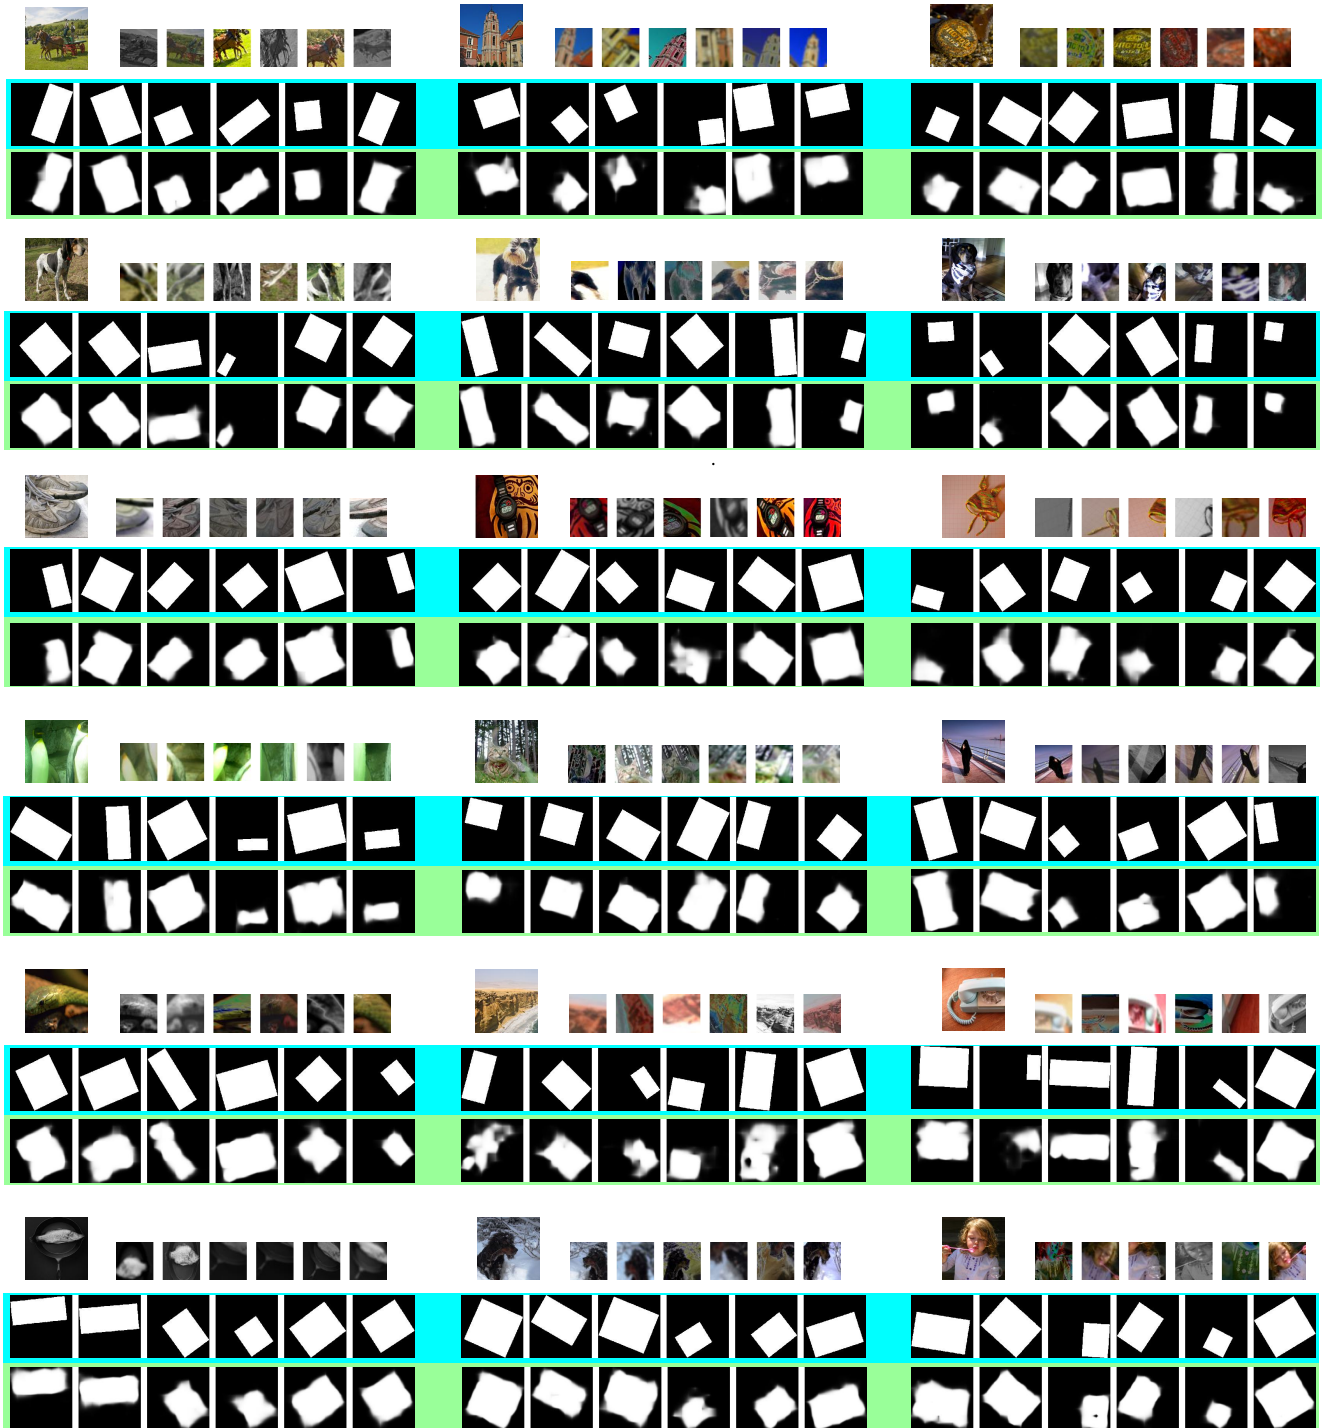

Figure 1. Visualization of *exemplar-context* images in company with both ground-truth and predicted correlation maps for CIM.

## References

- [1] Hangbo Bao, Li Dong, and Furu Wei. Beit: Bert pre-training of image transformers. *arXiv preprint arXiv:2106.08254*, 2021. [1](#), [2](#)
- [2] Maxim Berman, Hervé Jégou, Andrea Vedaldi, Iasonas Kokkinos, and Matthijs Douze. Multigrain: a unified image embedding for classes and instances. *arXiv preprint arXiv:1902.05509*, 2019. [2](#)
- [3] Mark Chen, Alec Radford, Rewon Child, Jeffrey Wu, Heewoo Jun, David Luan, and Ilya Sutskever. Generative pretraining from pixels. In *ICML*, 2020. [1](#)
- [4] Kevin Clark, Minh-Thang Luong, Quoc V Le, and Christopher D Manning. Electra: Pre-training text encoders as discriminators rather than generators. *arXiv preprint arXiv:2003.10555*, 2020. [2](#)
- [5] Ekin D Cubuk, Barret Zoph, Jonathon Shlens, and Quoc V Le. Randaugment: Practical automated data augmentation with a reduced search space. In *CVPRW*, 2020. [2](#)
- [6] Jacob Devlin, Ming-Wei Chang, Kenton Lee, and Kristina Toutanova. Bert: Pre-training of deep bidirectional transformers for language understanding. In *NAACL*, 2019. [1](#)
- [7] Alexey Dosovitskiy, Lucas Beyer, Alexander Kolesnikov, Dirk Weissenborn, Xiaohua Zhai, Thomas Unterthiner, Mostafa Dehghani, Matthias Minderer, Georg Heigold, Sylvain Gelly, et al. An image is worth 16x16 words: Transformers for image recognition at scale. In *ICLR*, 2020. [1](#)
- [8] Yuxin Fang, Li Dong, Hangbo Bao, Xinggang Wang, and Furu Wei. Corrupted image modeling for self-supervised visual pre-training. *arXiv preprint arXiv:2202.03382*, 2022. [1](#), [2](#)
- [9] Elad Hoffer, Tal Ben-Nun, Itay Hubara, Niv Giladi, Torsten Hoefer, and Daniel Soudry. Augment your batch: better training with larger batches. *arXiv preprint arXiv:1901.09335*, 2019. [2](#)
- [10] Gao Huang, Yu Sun, Zhuang Liu, Daniel Sedra, and Kilian Q Weinberger. Deep networks with stochastic depth. In *ECCV*, 2016. [1](#), [2](#)
- [11] Ilya Loshchilov and Frank Hutter. Decoupled weight decay regularization. *arXiv preprint arXiv:1711.05101*, 2017. [1](#), [2](#)
- [12] Yada Pruksachatkun, Jason Phang, Haokun Liu, Phu Mon Htut, Xiaoyi Zhang, Richard Yuanzhe Pang, Clara Vania, Katharina Kann, and Samuel R Bowman. Intermediate-task transfer learning with pretrained models for natural language understanding: When and why does it work? In *ACL*, 2020. [1](#)
- [13] Nitish Srivastava, Geoffrey Hinton, Alex Krizhevsky, Ilya Sutskever, and Ruslan Salakhutdinov. Dropout: a simple way to prevent neural networks from overfitting. *JMLR*, 2014. [1](#), [2](#)
- [14] Christian Szegedy, Vincent Vanhoucke, Sergey Ioffe, Jon Shlens, and Zbigniew Wojna. Rethinking the inception architecture for computer vision. In *CVPR*, 2016. [2](#)
- [15] Hugo Touvron, Matthieu Cord, Alexandre Sablayrolles, Gabriel Synnaeve, and Hervé Jégou. Going deeper with image transformers. In *ICCV*, 2021. [1](#)
- [16] Ross Wightman, Hugo Touvron, and Hervé Jégou. Resnet strikes back: An improved training procedure in timm. *arXiv preprint arXiv:2110.00476*, 2021. [1](#), [2](#)
- [17] Tete Xiao, Yingcheng Liu, Bolei Zhou, Yuning Jiang, and Jian Sun. Unified perceptual parsing for scene understanding. In *ECCV*, 2018. [1](#)
- [18] Sangdoon Yun, Dongyoon Han, Seong Joon Oh, Sanghyuk Chun, Junsuk Choe, and Youngjoon Yoo. Cutmix: Regularization strategy to train strong classifiers with localizable features. In *ICCV*, 2019. [2](#)
- [19] Hongyi Zhang, Moustapha Cisse, Yann N Dauphin, and David Lopez-Paz. mixup: Beyond empirical risk minimization. *arXiv preprint arXiv:1710.09412*, 2017. [2](#)
